# Supplementary material for: Proteomic Characterization of the Cellular Effects of AhR Activation by Microbial Tryptophan Catabolites in Endotoxin-Activated Human Macrophages
Source: MDPI journal article supplement (doi:10.3390/ijerph181910336), 2021-09-30
Supplement: s1 [file s1]

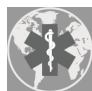

## Supplementary Figures

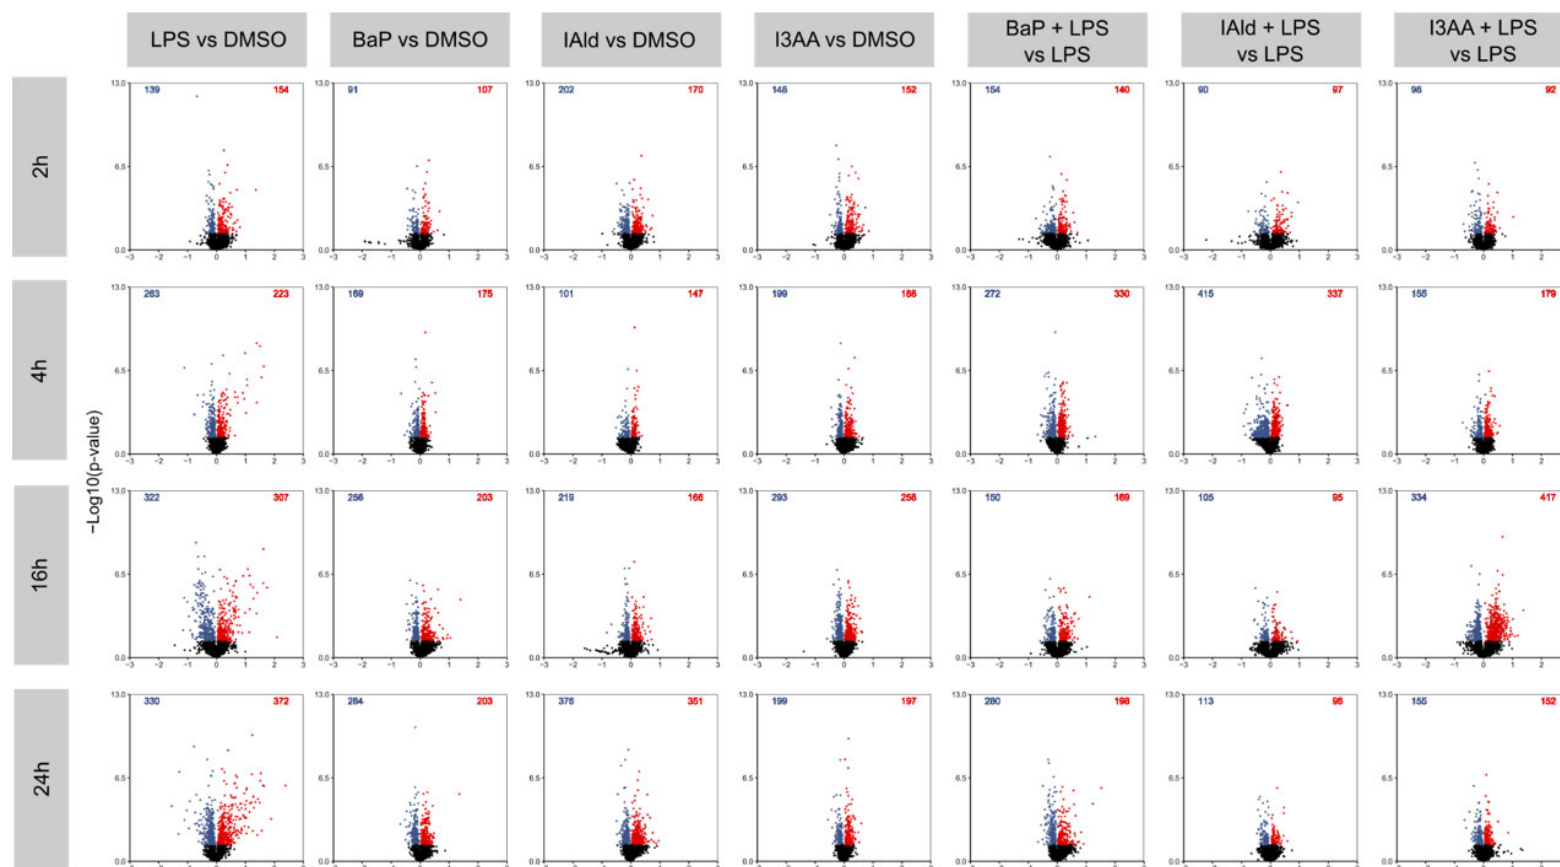

**Figure S1.** Changes in protein abundances after 2, 4, 16, and 24 h of BaP, IAld, or I3AA treatment with or without LPS stimulation compared to the respective control. Significantly affected proteins (regulated proteins) were highlighted in blue ( $p \leq 0.05$ ,  $\text{Log}_2 \text{FC} < 0$ ) or red ( $p \leq 0.05$ ,  $\text{Log}_2 \text{FC} > 0$ ) ( $n = 6$  for 2 h and 4 h,  $n = 5$  for 16 h and 24 h).

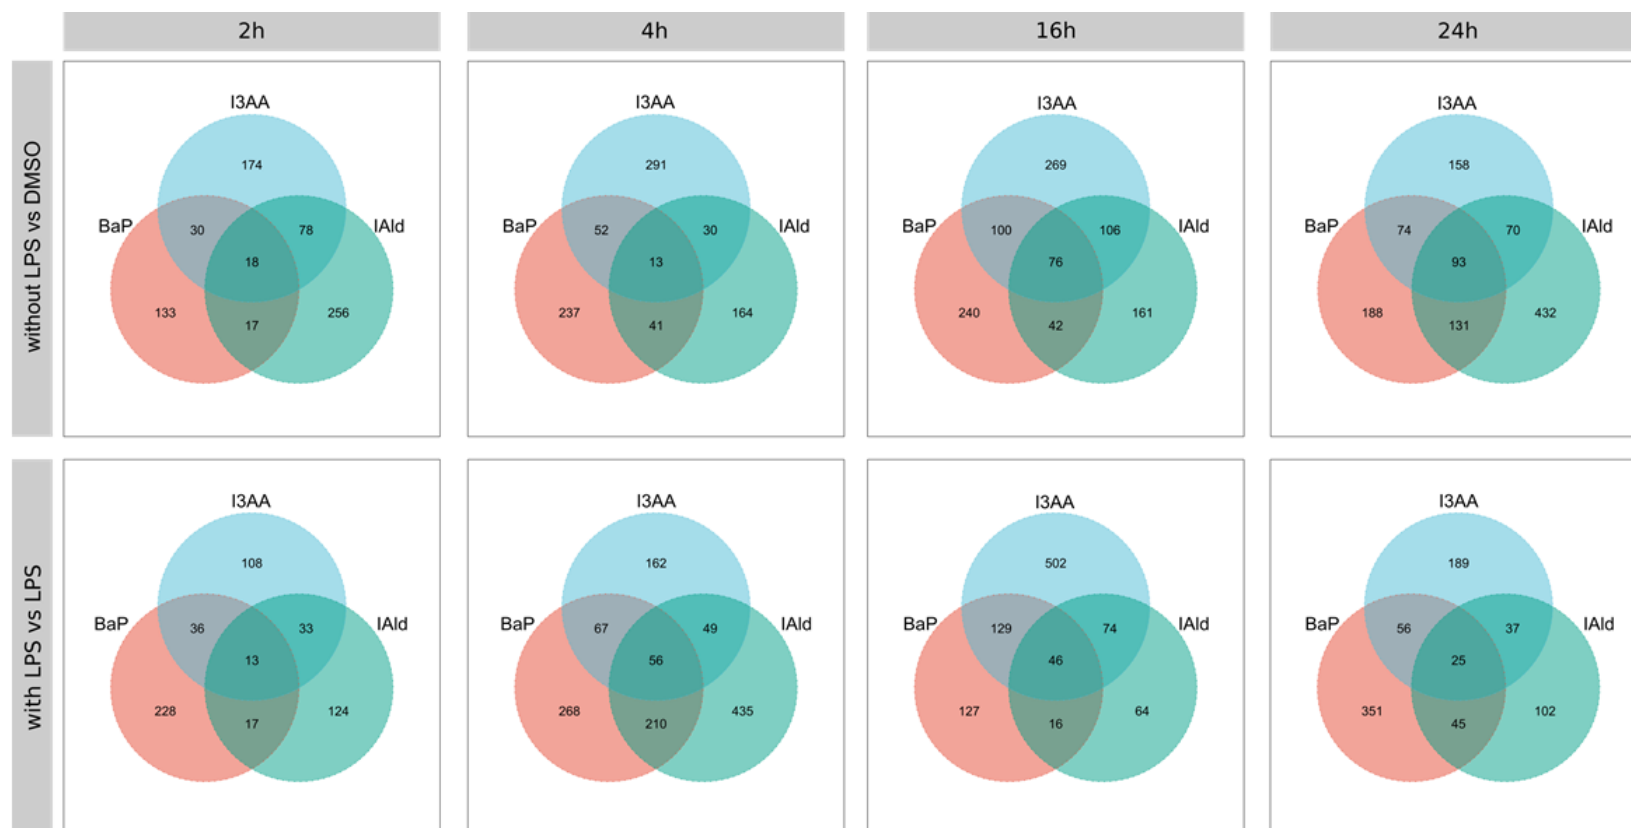

**Figure S2.** Overlap of regulated proteins, determined in comparison to the respective controls, after 2, 4, 16, and 24 h of stimulation with BaP, IAld, or I3AA with or without LPS ( $n = 6$  for 2 h and 4 h,  $n = 5$  for 16 h and 24 h).

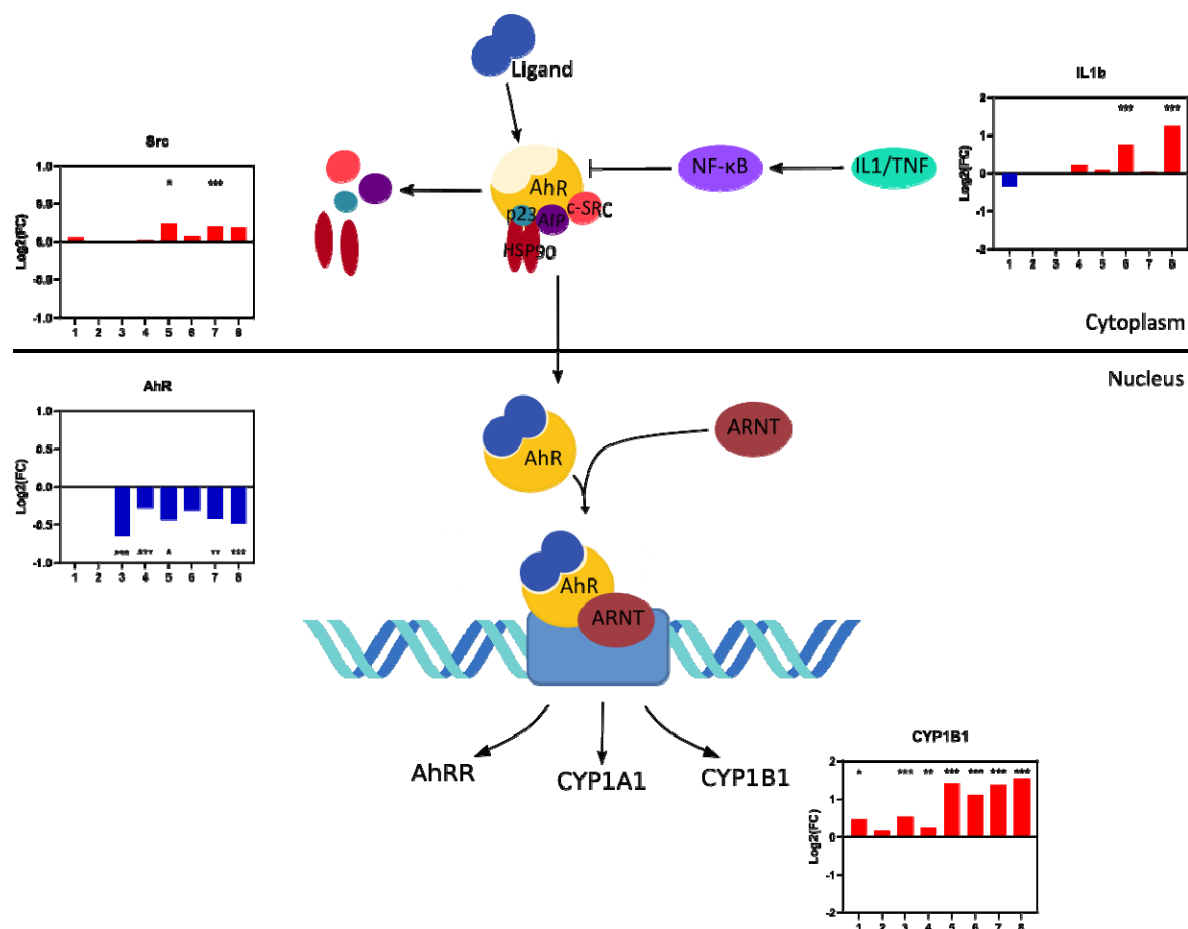

**Figure S3.** Simplified genomic AhR-Pathway based on the IPA database. AhR is released from the cytosolic multi-protein complex after ligand binding and moves to the nucleus. There, a complex with the AhR nuclear translocator (ARNT) is formed to enable DNA-binding and transcription of target genes as the AhR repressor (AhRR) or Cytochrome P450 (CYP) 1A1 and 1B1. Activation of the NF-κB pathway, e.g. by IL-1β or TNF, can inhibit AhR-activity. The detected abundances of regulated proteins related to this pathway are shown for stimulation with BaP as blue (Log2 FC < 0) or red (Log2 FC > 0). The significances are indicated with asterisks:  $p \leq 0.05$  (\*),  $p \leq 0.01$  (\*\*),  $p \leq 0.001$  (\*\*\*). The different conditions are numbered as follows: 1 = 2 h BaP vs DMSO; 2 = 2 h BaP + LPS vs LPS; 3 = 4 h BaP vs DMSO; 4 = 4 h BaP + LPS vs LPS; 5 = 16 h BaP vs DMSO; 6 = 16 h BaP + LPS vs LPS; 7 = 24 h BaP vs DMSO; 8 = 24 h BaP + LPS vs LPS ( $n = 6$  for 2 h and 4 h,  $n = 5$  for 16 h and 24 h).
